# Supplementary material for: Statistical prediction of protein structural, localization and functional properties by the analysis of its fragment mass distributions after proteolytic cleavage
Source: PubMed Central journal article supplement (PMC4770285; doi:10.1038/srep22286), 2016-02-29
Supplement: srep22286-s1.pdf [file srep22286-s1.pdf]

## to «Statistical prediction of protein structural, localization and functional properties by the analysis of its fragment mass distributions after proteolytic cleavage»

by Mikhail Bogachev, Airat Kayumov, Oleg Markelov and Armin Bunde

# Prediction models and validation of their accuracy for various protein groups

---

## Table of Contents

|                                                                                                                                                                                              |    |
|----------------------------------------------------------------------------------------------------------------------------------------------------------------------------------------------|----|
| S1 Classification according to structural properties .....                                                                                                                                   | 2  |
| S1.1 Classification by SCOP (Structural Classification Of Proteins).....                                                                                                                     | 2  |
| S1.1.1 25pdb low homology dataset.....                                                                                                                                                       | 2  |
| S1.1.2 1189 low homology dataset.....                                                                                                                                                        | 4  |
| S1.2 Comparison of SCOP-classified proteins vs Intrinsically disordered proteins.....                                                                                                        | 6  |
| S1.2.1 25pdb low homology dataset + intrinsically disordered proteins (obtained from the <i>DisProt</i> database) ....                                                                       | 6  |
| S1.2.2 25pdb low homology dataset + intrinsically disordered proteins (obtained from the <i>Ideal</i> database) .....                                                                        | 8  |
| S1.2.3 25pdb low homology dataset + intrinsically disordered proteins (obtained from the <i>Ideal</i> database) .....                                                                        | 10 |
| S1.2.4 1189 low homology dataset + intrinsically disordered proteins (obtained from the <i>DisProt</i> database) ....                                                                        | 11 |
| S1.2.5 1189 low homology dataset + intrinsically disordered proteins (obtained from the <i>Ideal</i> database) .....                                                                         | 13 |
| S1.2.6 1189 low homology dataset (subset) + intrinsically disordered proteins (obtained from the <i>Ideal</i> database).....                                                                 | 15 |
| S1.3 Classification of transmembrane proteins (subset obtained from <a href="http://pdbtm.enzim.hu">http://pdbtm.enzim.hu</a> ) .....                                                        | 16 |
| S2 Classification by localization properties.....                                                                                                                                            | 17 |
| S2.1 Low-homology data obtained from UniProtKB/Swiss-Prot database.....                                                                                                                      | 17 |
| S2.1.1 Prediction of membrane associated proteins.....                                                                                                                                       | 17 |
| S2.1.2 Classification of membrane associated proteins .....                                                                                                                                  | 18 |
| S2.1.3 Classification of polytopic transmembrane proteins .....                                                                                                                              | 20 |
| S2.1.4 Classification of non-membrane proteins.....                                                                                                                                          | 21 |
| S2.2 High homology data from pathogenic <i>Firmicutes</i> and <i>Proteobacteria</i> (obtained from <a href="http://www.mgc.ac.cn/VFs/main.htm">http://www.mgc.ac.cn/VFs/main.htm</a> ) ..... | 23 |
| S2.2.1 Prediction of membrane proteins.....                                                                                                                                                  | 23 |
| S2.2.2 Prediction of membrane proteins (obtained from <a href="http://www.mgc.ac.cn/VFs/main.htm">http://www.mgc.ac.cn/VFs/main.htm</a> ) .....                                              | 24 |
| Supplementary S2.2.3 Prediction of membrane proteins by host organism .....                                                                                                                  | 26 |
| S3 Classification by functional properties.....                                                                                                                                              | 27 |
| S3.1 Classification of non-membrane proteins obtained from UniProtKB/Swiss-Prot database.....                                                                                                | 27 |
| S3.1.1 General functional classification .....                                                                                                                                               | 27 |
| S3.1.2 Prediction of cytoskeleton proteins among non-membrane proteins (Selected cases).....                                                                                                 | 29 |
| S3.1.3 Prediction of cytosolic non-cytoskeletal proteins by function.....                                                                                                                    | 31 |
| S3.2 Classification of membrane proteins obtained from RCSB PDB database.....                                                                                                                | 33 |
| S3.3 Classification of membrane proteins (Selected example) .....                                                                                                                            | 35 |
| S3.4 Classification of membrane proteins (Selected example for transmembrane proteins of <i>Firmicutes</i> except <i>Heliobacteria</i> , no photosynthetic, no ATP-binding).....             | 36 |

## S1 Classification according to structural properties

### S1.1 Classification by SCOP (StrUctural Classification Of Proteins)

#### S1.1.1 25pdb low homology dataset

Considered protein groups: all-alpha (1) vs all-beta (2) vs alpha/beta (3) vs alpha+beta (4)

**Supplementary Table S1.1.1a**  
Variables Entered/Removed<sup>a,b,c,d</sup>

| Step | Entered | Statistic | Between Groups |
|------|---------|-----------|----------------|
| 1    | FLWYAEQ | .029      | 1 and 3        |
| 2    | DEK     | .071      | 1 and 4        |
| 3    | FLMWY   | .145      | 3 and 4        |
| 4    | FYW     | .189      | 2 and 4        |
| 5    | KR      | .211      | 2 and 4        |
| 6    | K       | .222      | 2 and 4        |
| 7    | D       | .225      | 2 and 4        |
| 8    | AFYWLIV | .225      | 2 and 4        |
| 9    | E       | .226      | 2 and 4        |
| 10   | AFILMV  | .226      | 2 and 4        |

At each step, the variable that maximizes the Mahalanobis distance between the two closest groups is entered.

- Maximum number of steps is 32.
- Maximum significance of F to enter is .05.
- Minimum significance of F to remove is .10.
- F level, tolerance, or VIN insufficient for further computation.

**Supplementary Table S1.1.1b**  
Standardized Canonical Discriminant  
Function Coefficients

|         | Function |       |       |
|---------|----------|-------|-------|
|         | 1        | 2     | 3     |
| AFILMV  | .316     | .273  | -.395 |
| AFYWLIV | .292     | -.336 | .238  |
| D       | -.371    | .197  | .161  |
| DEK     | .243     | .291  | .341  |
| E       | -.203    | .307  | -.096 |
| FLMWY   | .122     | .681  | -.400 |
| FLWYAEQ | .396     | .069  | .377  |
| FYW     | -.169    | .052  | .704  |
| K       | -.283    | -.021 | -.203 |
| KR      | .046     | .308  | .221  |

**Supplementary Table S1.1.1c**  
**Classification Results<sup>a,b</sup>**

|                  |          |       | Group | Predicted Group Membership |      |      |      | Total |       |
|------------------|----------|-------|-------|----------------------------|------|------|------|-------|-------|
|                  |          |       |       | 1                          | 2    | 3    | 4    |       |       |
| Selected cases   | Original | Count | 1     | 74                         | 18   | 36   | 26   | 154   |       |
|                  |          |       | 2     | 43                         | 85   | 59   | 46   | 233   |       |
|                  |          |       | 3     | 35                         | 38   | 130  | 31   | 234   |       |
|                  |          |       | 4     | 39                         | 58   | 57   | 42   | 196   |       |
|                  | %        |       | Group | 1                          | 48.1 | 11.7 | 23.4 | 16.9  | 100.0 |
|                  |          |       |       | 2                          | 18.5 | 36.5 | 25.3 | 19.7  | 100.0 |
|                  |          |       |       | 3                          | 15.0 | 16.2 | 55.6 | 13.2  | 100.0 |
|                  |          |       |       | 4                          | 19.9 | 29.6 | 29.1 | 21.4  | 100.0 |
| Unselected cases | Original | Count | 1     | 24                         | 11   | 19   | 11   | 65    |       |
|                  |          |       | 2     | 14                         | 33   | 19   | 25   | 91    |       |
|                  |          |       | 3     | 15                         | 18   | 49   | 5    | 87    |       |
|                  |          |       | 4     | 23                         | 26   | 22   | 24   | 95    |       |
|                  | %        |       | Group | 1                          | 36.9 | 16.9 | 29.2 | 16.9  | 100.0 |
|                  |          |       |       | 2                          | 15.4 | 36.3 | 20.9 | 27.5  | 100.0 |
|                  |          |       |       | 3                          | 17.2 | 20.7 | 56.3 | 5.7   | 100.0 |
|                  |          |       |       | 4                          | 24.2 | 27.4 | 23.2 | 25.3  | 100.0 |

a. 40.5% of Selected original grouped cases correctly classified.

b. 38.5% of Unselected original grouped cases correctly classified.

**S1.1.2 1189 low homology dataset**

**Considered protein groups: all-alpha (1) vs all-beta (2) vs alpha/beta (3) vs alpha+beta (4)**

**Supplementary Table S1.1.2a**  
**Variables Entered/Removed<sup>a,b,c,d</sup>**

|    | Entered | Removed | Statistic | Between Groups |
|----|---------|---------|-----------|----------------|
| 1  | DEK     |         | .012      | 3 and 4        |
| 2  | M       |         | .033      | 3 and 4        |
| 3  | AFILMV  |         | .050      | 2 and 4        |
| 4  | FLWYAEQ |         | .115      | 1 and 3        |
| 5  | FYW     |         | .149      | 2 and 4        |
| 6  | E       |         | .153      | 2 and 4        |
| 7  | FLMWY   |         | .156      | 2 and 4        |
| 8  | D       |         | .159      | 2 and 4        |
| 9  |         | FYW     | .145      | 2 and 4        |
| 10 | KR      |         | .182      | 2 and 4        |
| 11 | FL      |         | .183      | 2 and 4        |

At each step, the variable that maximizes the Mahalanobis distance between the two closest groups is entered.

- a. Maximum number of steps is 32.
- b. Maximum significance of F to enter is .05.
- c. Minimum significance of F to remove is .10.
- d. F level, tolerance, or VIN insufficient for further computation.

**Supplementary Table S1.1.2b**  
**Standardized Canonical Discriminant**  
**Function Coefficients**

|         | Function |       |       |
|---------|----------|-------|-------|
|         | 1        | 2     | 3     |
| AFILMV  | .529     | -.359 | -.341 |
| D       | -.080    | .559  | -.088 |
| DEK     | .447     | -.111 | -.019 |
| E       | .143     | .413  | .105  |
| FL      | .038     | .502  | -.224 |
| FLMWY   | .391     | .084  | -.415 |
| FLWYAEQ | .359     | .105  | .654  |
| KR      | .220     | .359  | .480  |
| M       | .311     | -.160 | .126  |

**Supplementary Table S1.1.2c**  
**Classification Results<sup>a,b</sup>**

|                  |          |       | Predicted Group Membership |      |      |       | Total |
|------------------|----------|-------|----------------------------|------|------|-------|-------|
|                  |          | Group | 1                          | 2    | 3    | 4     |       |
| Selected cases   | Original | Count | 1                          | 2    | 3    | 4     |       |
|                  |          | 1     | 47                         | 13   | 19   | 11    | 90    |
|                  |          | 2     | 30                         | 78   | 25   | 18    | 151   |
|                  |          | 3     | 46                         | 43   | 97   | 21    | 207   |
|                  |          | 4     | 30                         | 42   | 32   | 20    | 124   |
|                  | %        | 1     | 52.2                       | 14.4 | 21.1 | 12.2  | 100.0 |
|                  |          | 2     | 19.9                       | 51.7 | 16.6 | 11.9  | 100.0 |
|                  |          | 3     | 22.2                       | 20.8 | 46.9 | 10.1  | 100.0 |
| 4                |          | 24.2  | 33.9                       | 25.8 | 16.1 | 100.0 |       |
| Unselected cases | Original | Count | 1                          | 2    | 3    | 4     |       |
|                  |          | 1     | 14                         | 9    | 11   | 2     | 36    |
|                  |          | 2     | 13                         | 27   | 10   | 8     | 58    |
|                  |          | 3     | 21                         | 17   | 45   | 8     | 91    |
|                  |          | 4     | 10                         | 13   | 15   | 5     | 43    |
|                  | %        | 1     | 38.9                       | 25.0 | 30.6 | 5.6   | 100.0 |
|                  |          | 2     | 22.4                       | 46.6 | 17.2 | 13.8  | 100.0 |
|                  |          | 3     | 23.1                       | 18.7 | 49.5 | 8.8   | 100.0 |
| 4                |          | 23.3  | 30.2                       | 34.9 | 11.6 | 100.0 |       |

a. 42.3% of Selected original grouped cases correctly classified.

b. 39.9% of Unselected original grouped cases correctly classified.

## S1.2 Comparison of SCOP-classified proteins vs Intrinsically disordered proteins

### S1.2.1 25pdb low homology dataset + intrinsically disordered proteins (obtained from the *DisProt* database)

Considered protein groups: all-alpha (1) vs all-beta (2) vs alpha/beta (3) vs alpha+beta (4) vs intrinsic\_disprot (5)

**Supplementary Table S1.2.1a**  
Variables Entered/Removed<sup>a,b,c,d</sup>

| Step | Entered | Removed | Statistic | Between Groups |
|------|---------|---------|-----------|----------------|
| 1    | D       |         | .005      | 2 and 4        |
| 2    | DEK     |         | .056      | 2 and 4        |
| 3    | FLWYAEQ |         | .093      | 3 and 5        |
| 4    | FYW     |         | .120      | 1 and 4        |
| 5    | KRFYW   |         | .135      | 1 and 4        |
| 6    | AFILMV  |         | .147      | 2 and 4        |
| 7    | K       |         | .157      | 2 and 4        |
| 8    | FLMWY   |         | .163      | 2 and 4        |
| 9    | KR      |         | .169      | 2 and 4        |
| 10   | AFYWLIV |         | .172      | 2 and 4        |
| 11   | DE      |         | .176      | 2 and 4        |
| 12   | E       |         | .177      | 2 and 4        |
| 13   |         | DE      | .175      | 2 and 4        |
| 14   | FL      |         | .176      | 2 and 4        |

At each step, the variable that maximizes the Mahalanobis distance between the two closest groups is entered.

- Maximum number of steps is 32.
- Maximum significance of F to enter is .05.
- Minimum significance of F to remove is .10.
- F level, tolerance, or VIN insufficient for further computation.

**Supplementary Table S1.2.1b**  
Standardized Canonical Discriminant Function Coefficients

|         | Function |       |       |       |
|---------|----------|-------|-------|-------|
|         | 1        | 2     | 3     | 4     |
| AFILMV  | -.013    | .398  | -.170 | -.490 |
| AFYWLIV | .352     | -.166 | -.750 | .122  |
| D       | .367     | -.177 | .161  | .006  |
| DEK     | .069     | .323  | .008  | .371  |
| E       | .265     | .217  | .045  | .061  |
| FL      | .109     | .062  | .330  | -.177 |
| FLMWY   | .313     | .583  | .102  | -.062 |
| FLWYAEQ | -.378    | .272  | .047  | .464  |
| FYW     | .162     | -.045 | -.039 | .537  |
| K       | .432     | -.253 | -.022 | -.079 |
| KR      | -.334    | .458  | .415  | -.244 |
| KRFYW   | .012     | -.322 | -.109 | .464  |

**Supplementary Table S1.2.1c**  
**Classification Results<sup>a,b</sup>**

|                  |                |   | Predicted Group Membership |      |      |      |      | Total |
|------------------|----------------|---|----------------------------|------|------|------|------|-------|
|                  |                |   | Group                      | 1    | 2    | 3    | 4    |       |
| Selected cases   | Original Count | 1 | 79                         | 19   | 24   | 19   | 20   | 161   |
|                  |                | 2 | 40                         | 79   | 34   | 29   | 34   | 216   |
|                  |                | 3 | 41                         | 34   | 93   | 14   | 50   | 232   |
|                  |                | 4 | 51                         | 64   | 32   | 42   | 27   | 216   |
|                  |                | 5 | 39                         | 42   | 62   | 32   | 278  | 453   |
|                  | %              | 1 | 49.1                       | 11.8 | 14.9 | 11.8 | 12.4 | 100.0 |
|                  |                | 2 | 18.5                       | 36.6 | 15.7 | 13.4 | 15.7 | 100.0 |
|                  |                | 3 | 17.7                       | 14.7 | 40.1 | 6.0  | 21.6 | 100.0 |
|                  |                | 4 | 23.6                       | 29.6 | 14.8 | 19.4 | 12.5 | 100.0 |
|                  |                | 5 | 8.6                        | 9.3  | 13.7 | 7.1  | 61.4 | 100.0 |
| Unselected cases | Original Count | 1 | 21                         | 9    | 8    | 11   | 9    | 58    |
|                  |                | 2 | 24                         | 29   | 14   | 18   | 23   | 108   |
|                  |                | 3 | 17                         | 15   | 26   | 10   | 21   | 89    |
|                  |                | 4 | 20                         | 11   | 15   | 16   | 13   | 75    |
|                  |                | 5 | 18                         | 15   | 15   | 14   | 110  | 172   |
|                  | %              | 1 | 36.2                       | 15.5 | 13.8 | 19.0 | 15.5 | 100.0 |
|                  |                | 2 | 22.2                       | 26.9 | 13.0 | 16.7 | 21.3 | 100.0 |
|                  |                | 3 | 19.1                       | 16.9 | 29.2 | 11.2 | 23.6 | 100.0 |
|                  |                | 4 | 26.7                       | 14.7 | 20.0 | 21.3 | 17.3 | 100.0 |
|                  |                | 5 | 10.5                       | 8.7  | 8.7  | 8.1  | 64.0 | 100.0 |

a. 44.7% of Selected original grouped cases correctly classified.

b. 40.2% of Unselected original grouped cases correctly classified.

**S1.2.2 25pdb low homology dataset + intrinsically disordered proteins (obtained from the *Ideal* database)**

**Considered protein groups: all-alpha (1) vs all-beta (2) vs alpha/beta (3) vs alpha+beta (4) vs intrinsic\_ideal (5)**

**Supplementary Table S2.1.2.2a**  
**Variables Entered/Removed<sup>a,b,c,d</sup>**

|    | Entered | Removed | Statistic | Between Groups |
|----|---------|---------|-----------|----------------|
| 1  | FLWYAEQ |         | .009      | 3 and 5        |
| 2  | FLMWY   |         | .082      | 3 and 4        |
| 3  | FYW     |         | .108      | 2 and 4        |
| 4  | DEK     |         | .151      | 2 and 4        |
| 5  | K       |         | .166      | 2 and 4        |
| 6  | D       |         | .172      | 2 and 4        |
| 7  | DE      |         | .176      | 2 and 4        |
| 8  | E       |         | .178      | 2 and 4        |
| 9  | FL      |         | .180      | 2 and 4        |
| 10 | AFYWLIV |         | .181      | 2 and 4        |
| 11 | KR      |         | .181      | 2 and 4        |
| 12 |         | DEK     | .149      | 2 and 4        |
| 13 | AFILMV  |         | .149      | 2 and 4        |

At each step, the variable that maximizes the Mahalanobis distance between the two closest groups is entered.

- a. Maximum number of steps is 32.
- b. Maximum significance of F to enter is .05.
- c. Minimum significance of F to remove is .10.
- d. F level, tolerance, or VIN insufficient for further computation.

**Supplementary Table S1.2.2b**  
**Standardized Canonical Discriminant Function Coefficients**

|         | Function |       |       |       |
|---------|----------|-------|-------|-------|
|         | 1        | 2     | 3     | 4     |
| AFILMV  | -.184    | .366  | .162  | -.513 |
| AFYWLIV | .306     | .258  | -.701 | .015  |
| D       | .261     | -.206 | -.015 | -.188 |
| DE      | .072     | .392  | .005  | -.009 |
| E       | .378     | .080  | .220  | .056  |
| FL      | .171     | -.164 | .365  | .267  |
| FLMWY   | .260     | .404  | .398  | -.367 |
| FLWYAEQ | -.267    | .299  | .101  | .709  |
| FYW     | .319     | .052  | -.104 | .593  |
| K       | .368     | -.265 | -.159 | -.200 |
| KR      | -.250    | .046  | .531  | .050  |



**Supplementary Table S1.2.2c**  
**Classification Results<sup>a,b</sup>**

|                  |                |         | Predicted Group Membership |      |      |      |      | Total |
|------------------|----------------|---------|----------------------------|------|------|------|------|-------|
|                  |                |         | 1                          | 2    | 3    | 4    | 5    |       |
| Selected cases   | Original Count | Group 1 | 68                         | 24   | 23   | 17   | 11   | 143   |
|                  |                | Group 2 | 52                         | 85   | 40   | 23   | 27   | 227   |
|                  |                | Group 3 | 41                         | 33   | 96   | 25   | 30   | 225   |
|                  |                | Group 4 | 48                         | 48   | 46   | 33   | 17   | 192   |
|                  |                | Group 5 | 16                         | 35   | 43   | 4    | 290  | 388   |
|                  | %              | Group 1 | 47.6                       | 16.8 | 16.1 | 11.9 | 7.7  | 100.0 |
|                  |                | Group 2 | 22.9                       | 37.4 | 17.6 | 10.1 | 11.9 | 100.0 |
|                  |                | Group 3 | 18.2                       | 14.7 | 42.7 | 11.1 | 13.3 | 100.0 |
|                  |                | Group 4 | 25.0                       | 25.0 | 24.0 | 17.2 | 8.9  | 100.0 |
|                  |                | Group 5 | 4.1                        | 9.0  | 11.1 | 1.0  | 74.7 | 100.0 |
| Unselected cases | Original Count | Group 1 | 30                         | 10   | 13   | 13   | 10   | 76    |
|                  |                | Group 2 | 14                         | 36   | 17   | 14   | 16   | 97    |
|                  |                | Group 3 | 17                         | 15   | 35   | 10   | 19   | 96    |
|                  |                | Group 4 | 21                         | 34   | 17   | 17   | 10   | 99    |
|                  |                | Group 5 | 9                          | 17   | 18   | 2    | 134  | 180   |
|                  | %              | Group 1 | 39.5                       | 13.2 | 17.1 | 17.1 | 13.2 | 100.0 |
|                  |                | Group 2 | 14.4                       | 37.1 | 17.5 | 14.4 | 16.5 | 100.0 |
|                  |                | Group 3 | 17.7                       | 15.6 | 36.5 | 10.4 | 19.8 | 100.0 |
|                  |                | Group 4 | 21.2                       | 34.3 | 17.2 | 17.2 | 10.1 | 100.0 |
|                  |                | Group 5 | 5.0                        | 9.4  | 10.0 | 1.1  | 74.4 | 100.0 |

a. 48.7% of Selected original grouped cases correctly classified.

b. 46.0% of Unselected original grouped cases correctly classified.

**S1.2.3 25pdb low homology dataset + intrinsically disordered proteins (obtained from the *Ideal* database)**

**Considered protein groups: all SCOP (1) vs intrinsic\_ideal (5)**

**Supplementary Table S1.2.3a  
Variables in the Equation**

|                     |          | B       | S.E.  | Wald    |
|---------------------|----------|---------|-------|---------|
| Step 1 <sup>a</sup> | FYW      | -18.740 | 1.430 | 171.771 |
|                     | Constant | 2.468   | .238  | 107.207 |
| Step 2 <sup>b</sup> | E        | -15.602 | 1.443 | 116.924 |
|                     | FYW      | -16.989 | 1.520 | 124.923 |
|                     | Constant | 4.999   | .360  | 192.464 |
| Step 3 <sup>c</sup> | E        | -13.923 | 1.501 | 86.070  |
|                     | FYW      | -14.427 | 1.559 | 85.680  |
|                     | K        | -12.249 | 1.399 | 76.696  |
|                     | Constant | 6.361   | .425  | 224.034 |

**Supplementary Table S1.2.3b  
Classification Table<sup>c</sup>**

| Observed |                    | Predicted                   |     |                    |                               |     |                    |
|----------|--------------------|-----------------------------|-----|--------------------|-------------------------------|-----|--------------------|
|          |                    | Selected cases <sup>a</sup> |     |                    | Unselected cases <sup>b</sup> |     |                    |
|          |                    | Group                       |     | Percentage Correct | Group                         |     | Percentage Correct |
|          |                    | 1                           | 5   |                    | 1                             | 5   |                    |
| Step 1   | Group 1            | 528                         | 273 | 65.9               | 248                           | 106 | 70.1               |
|          | 5                  | 118                         | 280 | 70.4               | 55                            | 115 | 67.6               |
|          | Overall Percentage |                             |     | 67.4               |                               |     | 69.3               |
| Step 2   | Group 1            | 589                         | 212 | 73.5               | 256                           | 98  | 72.3               |
|          | 5                  | 97                          | 301 | 75.6               | 53                            | 117 | 68.8               |
|          | Overall Percentage |                             |     | 74.2               |                               |     | 71.2               |
| Step 3   | Group 1            | 614                         | 187 | 76.7               | 275                           | 79  | 77.7               |
|          | 5                  | 87                          | 311 | 78.1               | 49                            | 121 | 71.2               |
|          | Overall Percentage |                             |     | 77.1               |                               |     | 75.6               |

a. Selected cases Random LT 1

b. Unselected cases Random GE 1

c. The cut value is .330

**S1.2.4 1189 low homology dataset + intrinsically disordered proteins (obtained from the *DisProt* database)**

**Considered protein groups: all-alpha (1) vs all-beta (2) vs alpha/beta (3) vs alpha+beta (4) vs intrinsic\_disprot (5)**

**Supplementary Table S1.2.4a**  
**Variables Entered/Removed<sup>a,b,c,d</sup>**

|    | Entered | Removed | Statistic | Between Groups |
|----|---------|---------|-----------|----------------|
| 1  | AFYWLIV |         | .017      | 2 and 4        |
| 2  | DEK     |         | .059      | 2 and 4        |
| 3  | KR      |         | .118      | 1 and 3        |
| 4  | FLWYAEQ |         | .148      | 3 and 4        |
| 5  | KRFYW   |         | .179      | 3 and 4        |
| 6  | AFILMV  |         | .227      | 3 and 4        |
| 7  | D       |         | .253      | 2 and 4        |
| 8  |         | KRFYW   | .185      | 2 and 4        |
| 9  | DK      |         | .238      | 2 and 4        |
| 10 | R       |         | .257      | 2 and 4        |
| 11 | DE      |         | .269      | 2 and 4        |
| 12 | FL      |         | .271      | 2 and 4        |
| 13 | K       |         | .273      | 2 and 4        |
| 14 | E       |         | .273      | 2 and 4        |
| 15 |         | FL      | .269      | 2 and 4        |
| 16 |         | DE      | .259      | 2 and 4        |
| 17 | FLMWY   |         | .259      | 2 and 4        |

At each step, the variable that maximizes the Mahalanobis distance between the two closest groups is entered.

- a. Maximum number of steps is 32.
- b. Maximum significance of F to enter is .05.
- c. Minimum significance of F to remove is .10.
- d. F level, tolerance, or VIN insufficient for further computation.

**Supplementary Table S1.2.4b**  
**Standardized Canonical Discriminant Function**  
**Coefficients**

|         | Function |       |       |       |
|---------|----------|-------|-------|-------|
|         | 1        | 2     | 3     | 4     |
| AFILMV  | -.007    | .501  | -.145 | -.159 |
| AFYWLIV | .575     | -.321 | -.534 | .651  |
| D       | .365     | -.091 | .578  | .224  |
| DEK     | .075     | .555  | -.092 | .114  |
| DK      | .146     | -.357 | -.266 | -.376 |
| E       | .326     | .223  | .253  | -.039 |
| FLMWY   | .238     | .443  | .186  | -.572 |
| FLWYAEQ | -.280    | .345  | .421  | -.022 |
| K       | .314     | -.102 | .175  | .382  |
| KR      | -.471    | .142  | .379  | .413  |
| R       | .174     | .197  | -.166 | .347  |

**Supplementary Table S1.2.4c**  
**Classification Results<sup>a,b</sup>**

|                  |                |         | Predicted Group Membership |      |      |      |      | Total |
|------------------|----------------|---------|----------------------------|------|------|------|------|-------|
|                  |                |         | 1                          | 2    | 3    | 4    | 5    |       |
| Selected cases   | Original Count | Group 1 | 52                         | 7    | 18   | 7    | 14   | 98    |
|                  |                | Group 2 | 19                         | 52   | 22   | 12   | 27   | 132   |
|                  |                | Group 3 | 43                         | 36   | 73   | 23   | 32   | 207   |
|                  |                | Group 4 | 22                         | 31   | 23   | 16   | 32   | 124   |
|                  |                | Group 5 | 46                         | 55   | 48   | 24   | 267  | 440   |
|                  | %              | Group 1 | 53.1                       | 7.1  | 18.4 | 7.1  | 14.3 | 100.0 |
|                  |                | Group 2 | 14.4                       | 39.4 | 16.7 | 9.1  | 20.5 | 100.0 |
|                  |                | Group 3 | 20.8                       | 17.4 | 35.3 | 11.1 | 15.5 | 100.0 |
|                  |                | Group 4 | 17.7                       | 25.0 | 18.5 | 12.9 | 25.8 | 100.0 |
|                  |                | Group 5 | 10.5                       | 12.5 | 10.9 | 5.5  | 60.7 | 100.0 |
| Unselected cases | Original Count | Group 1 | 8                          | 7    | 2    | 2    | 9    | 28    |
|                  |                | Group 2 | 10                         | 30   | 8    | 13   | 16   | 77    |
|                  |                | Group 3 | 12                         | 20   | 28   | 10   | 21   | 91    |
|                  |                | Group 4 | 11                         | 16   | 6    | 3    | 7    | 43    |
|                  |                | Group 5 | 21                         | 23   | 21   | 7    | 113  | 185   |
|                  | %              | Group 1 | 28.6                       | 25.0 | 7.1  | 7.1  | 32.1 | 100.0 |
|                  |                | Group 2 | 13.0                       | 39.0 | 10.4 | 16.9 | 20.8 | 100.0 |
|                  |                | Group 3 | 13.2                       | 22.0 | 30.8 | 11.0 | 23.1 | 100.0 |
|                  |                | Group 4 | 25.6                       | 37.2 | 14.0 | 7.0  | 16.3 | 100.0 |
|                  |                | Group 5 | 11.4                       | 12.4 | 11.4 | 3.8  | 61.1 | 100.0 |

a. 46.0% of Selected original grouped cases correctly classified.

b. 42.9% of Unselected original grouped cases correctly classified.

**S1.2.5 1189 low homology dataset + intrinsically disordered proteins (obtained from the *Ideal* database)**

**Considered protein groups: all-alpha (1) vs all-beta (2) vs alpha/beta (3) vs alpha+beta (4) vs intrinsic\_ideal (5)**

**Supplementary Table S1.2.5a**  
**Variables Entered/Removed<sup>a,b,c,d</sup>**

|    | Entered | Removed | Statistic | Between Groups |
|----|---------|---------|-----------|----------------|
| 1  | AFYWLIV |         | .013      | 2 and 4        |
| 2  | DEK     |         | .063      | 1 and 3        |
| 3  | K       |         | .116      | 3 and 4        |
| 4  | DK      |         | .143      | 3 and 4        |
| 5  | AFILMV  |         | .166      | 3 and 4        |
| 6  | D       |         | .220      | 1 and 3        |
| 7  | FYW     |         | .263      | 1 and 3        |
| 8  | FLWYAEQ |         | .345      | 1 and 4        |
| 9  | KR      |         | .360      | 3 and 4        |
| 10 | E       |         | .371      | 3 and 4        |
| 11 | FL      |         | .373      | 3 and 4        |
| 12 | FLMWY   |         | .375      | 3 and 4        |
| 13 |         | FL      | .372      | 3 and 4        |

At each step, the variable that maximizes the Mahalanobis distance between the two closest groups is entered.

- a. Maximum number of steps is 32.
- b. Maximum significance of F to enter is .05.
- c. Minimum significance of F to remove is .10.
- d. F level, tolerance, or VIN insufficient for further computation.

**Supplementary Table S1.2.5b**  
**Standardized Canonical Discriminant Function Coefficients**

|         | Function |       |       |       |
|---------|----------|-------|-------|-------|
|         | 1        | 2     | 3     | 4     |
| AFILMV  | -.186    | .544  | -.061 | -.101 |
| AFYWLIV | .487     | -.037 | -.670 | .273  |
| D       | .193     | -.103 | .483  | .752  |
| DEK     | -.132    | .530  | .003  | .547  |
| DK      | .164     | -.077 | -.399 | -.566 |
| E       | .361     | -.115 | .183  | -.042 |
| FLMWY   | .302     | .398  | .274  | -.357 |
| FLWYAEQ | -.141    | .286  | .448  | .257  |
| FYW     | .326     | .092  | .026  | -.318 |
| K       | .382     | -.082 | .242  | -.041 |
| KR      | -.258    | .152  | .487  | -.381 |

**Supplementary Table S1.2.5c**  
**Classification Results<sup>a,b</sup>**

|                |                  |                | Predicted Group Membership |      |      |      |      | Total |
|----------------|------------------|----------------|----------------------------|------|------|------|------|-------|
|                |                  |                | 1                          | 2    | 3    | 4    | 5    |       |
| Selected cases | Original Count   | Group 1        | 45                         | 12   | 16   | 10   | 8    | 91    |
|                |                  | Group 2        | 22                         | 64   | 19   | 19   | 16   | 140   |
|                |                  | Group 3        | 31                         | 41   | 75   | 27   | 32   | 206   |
|                |                  | Group 4        | 29                         | 26   | 21   | 21   | 13   | 110   |
|                |                  | Group 5        | 21                         | 38   | 25   | 11   | 285  | 380   |
|                |                  | %              | 1                          | 49.5 | 13.2 | 17.6 | 11.0 | 8.8   |
|                | Group 2          | 2              | 15.7                       | 45.7 | 13.6 | 13.6 | 11.4 | 100.0 |
|                | Group 3          | 3              | 15.0                       | 19.9 | 36.4 | 13.1 | 15.5 | 100.0 |
|                | Group 4          | 4              | 26.4                       | 23.6 | 19.1 | 19.1 | 11.8 | 100.0 |
|                | Group 5          | 5              | 5.5                        | 10.0 | 6.6  | 2.9  | 75.0 | 100.0 |
|                | Unselected cases | Original Count | Group 1                    | 13   | 5    | 6    | 5    | 6     |
| Group 2        |                  |                | 12                         | 27   | 10   | 7    | 13   | 69    |
| Group 3        |                  |                | 16                         | 15   | 30   | 15   | 16   | 92    |
| Group 4        |                  |                | 12                         | 22   | 9    | 7    | 7    | 57    |
| Group 5        |                  |                | 9                          | 17   | 18   | 12   | 132  | 188   |
| %              |                  |                | 1                          | 37.1 | 14.3 | 17.1 | 14.3 | 17.1  |
| Group 2        |                  | 2              | 17.4                       | 39.1 | 14.5 | 10.1 | 18.8 | 100.0 |
| Group 3        |                  | 3              | 17.4                       | 16.3 | 32.6 | 16.3 | 17.4 | 100.0 |
| Group 4        |                  | 4              | 21.1                       | 38.6 | 15.8 | 12.3 | 12.3 | 100.0 |
| Group 5        |                  | 5              | 4.8                        | 9.0  | 9.6  | 6.4  | 70.2 | 100.0 |

a. 52.9% of Selected original grouped cases correctly classified.

b. 47.4% of Unselected original grouped cases correctly classified.

**S1.2.6 1189 low homology dataset (subset) + intrinsically disordered proteins (obtained from the *Ideal* database)**

**Considered protein groups: all SCOP (1) vs intrinsic\_ideal (5)**

**Supplementary Table S1.2.6a  
Variables in the Equation**

|                     |          | B       | S.E.  | Wald    |
|---------------------|----------|---------|-------|---------|
| Step 1 <sup>a</sup> | E        | -15.841 | 1.404 | 127.322 |
|                     | Constant | 2.510   | .255  | 96.666  |
| Step 2 <sup>b</sup> | E        | -13.626 | 1.452 | 88.057  |
|                     | FYW      | -13.750 | 1.556 | 78.103  |
|                     | Constant | 4.411   | .359  | 151.090 |
| Step 3 <sup>c</sup> | E        | -13.819 | 1.493 | 85.706  |
|                     | FLMWY    | -15.003 | 2.098 | 51.121  |
|                     | FYW      | -12.816 | 1.594 | 64.625  |
|                     | Constant | 7.389   | .590  | 156.611 |
| Step 4 <sup>d</sup> | E        | -12.386 | 1.532 | 65.392  |
|                     | FLMWY    | -15.858 | 2.178 | 52.992  |
|                     | FYW      | -11.534 | 1.624 | 50.421  |
|                     | K        | -7.967  | 1.306 | 37.203  |
|                     | Constant | 8.453   | .649  | 169.382 |

- a. Variable(s) entered on step 1: E.
- b. Variable(s) entered on step 2: FYW.
- c. Variable(s) entered on step 3: FLMWY.
- d. Variable(s) entered on step 4: K.

**Supplementary Table S1.2.6b  
Classification Table<sup>c</sup>**

| Observed | Group              | Predicted                   |     |                    |                               |     |                    |
|----------|--------------------|-----------------------------|-----|--------------------|-------------------------------|-----|--------------------|
|          |                    | Selected cases <sup>a</sup> |     |                    | Unselected cases <sup>b</sup> |     |                    |
|          |                    | Group                       |     | Percentage Correct | Group                         |     | Percentage Correct |
|          |                    | 1                           | 5   |                    | 1                             | 5   |                    |
| Step 1   | Group 1            | 393                         | 168 | 70.1               | 152                           | 87  | 63.6               |
|          | 5                  | 123                         | 268 | 68.5               | 57                            | 120 | 67.8               |
|          | Overall Percentage |                             |     | 69.4               |                               |     | 65.4               |
| Step 2   | Group 1            | 432                         | 129 | 77.0               | 173                           | 66  | 72.4               |
|          | 5                  | 124                         | 267 | 68.3               | 52                            | 125 | 70.6               |
|          | Overall Percentage |                             |     | 73.4               |                               |     | 71.6               |
| Step 3   | Group 1            | 425                         | 136 | 75.8               | 181                           | 58  | 75.7               |
|          | 5                  | 112                         | 279 | 71.4               | 57                            | 120 | 67.8               |
|          | Overall Percentage |                             |     | 73.9               |                               |     | 72.4               |
| Step 4   | Group 1            | 443                         | 118 | 79.0               | 184                           | 55  | 77.0               |
|          | 5                  | 107                         | 284 | 72.6               | 50                            | 127 | 71.8               |
|          | Overall Percentage |                             |     | 76.4               |                               |     | 74.8               |

- a. Selected cases Random LT 1
- b. Unselected cases Random GE 1
- c. The cut value is .450

### S1.3 Classification of transmembrane proteins (subset obtained from <http://pdbtm.enzim.hu>)

Considered protein groups: beta-sheets (1) vs alpha-helices (2)

**Supplementary Table S1.3a**  
Variables in the Equation

|                     |          | B       | S.E.  | Wald   |
|---------------------|----------|---------|-------|--------|
| Step 1 <sup>a</sup> | AFILMV   | 41.917  | 4.503 | 86.654 |
|                     | Constant | -9.566  | 1.080 | 78.423 |
| Step 2 <sup>b</sup> | AFILMV   | 40.646  | 4.715 | 47.995 |
|                     | DE       | -9.055  | 3.822 | 45.849 |
| Step 3 <sup>c</sup> | Constant | 7.844   | 1.297 | 91.542 |
|                     | AFILMV   | 38.233  | 5.181 | 45.394 |
|                     | DE       | -8.473  | 4.209 | 32.816 |
| Step 4 <sup>d</sup> | FYW      | -11.597 | 3.101 | 26.435 |
|                     | Constant | -5.142  | 1.493 | 32.589 |
|                     | AFILMV   | 38.771  | 5.296 | 28.464 |
|                     | DE       | -9.131  | 3.339 | 27.598 |
|                     | DK       | -11.547 | 4.284 | 24.447 |
|                     | FYW      | 1.704   | 1.087 | 6.416  |
|                     | Constant | -5.447  | 1.793 | 15.832 |

a. Variable(s) entered on step 1: AFILMV.

b. Variable(s) entered on step 2: DE.

c. Variable(s) entered on step 3: FYW.

d. Variable(s) entered on step 4: DK.

**Supplementary Table S1.3b**  
Classification Table<sup>c</sup>

| Observed |                    |      | Predicted                   |      |                               |       |      |                    |
|----------|--------------------|------|-----------------------------|------|-------------------------------|-------|------|--------------------|
|          |                    |      | Selected cases <sup>a</sup> |      | Unselected cases <sup>b</sup> |       |      |                    |
|          |                    |      | Group                       |      | Percentage Correct            | Group |      | Percentage Correct |
|          |                    |      | 1.00                        | 2.00 |                               | 1.00  | 2.00 |                    |
| Step 1   | Group              | 1.00 | 385                         | 46   | 89.3                          | 167   | 16   | 91.3               |
|          |                    | 2.00 | 68                          | 345  | 83.5                          | 27    | 148  | 85.6               |
|          | Overall Percentage |      |                             |      | 86.5                          |       |      | 88.0               |
| Step 2   | Group              | 1.00 | 377                         | 54   | 87.5                          | 160   | 23   | 87.4               |
|          |                    | 2.00 | 44                          | 369  | 89.3                          | 12    | 163  | 93.1               |
|          | Overall Percentage |      |                             |      | 88.4                          |       |      | 90.2               |
| Step 3   | Group              | 1.00 | 377                         | 54   | 87.5                          | 166   | 17   | 90.7               |
|          |                    | 2.00 | 44                          | 369  | 89.3                          | 12    | 163  | 93.1               |
|          | Overall Percentage |      |                             |      | 88.4                          |       |      | 91.9               |
| Step 4   | Group              | 1.00 | 389                         | 42   | 90.3                          | 166   | 17   | 90.7               |
|          |                    | 2.00 | 47                          | 366  | 88.6                          | 19    | 156  | 89.1               |
|          | Overall Percentage |      |                             |      | 89.5                          |       |      | 89.9               |

a. Selected cases Approximately 70% of the cases (SAMPLE) EQ 1

b. Unselected cases Approximately 70% of the cases (SAMPLE) NE 1

c. The cut value is 0.630



## S2 Classification by localization properties

### S2.1 Low-homology data obtained from UniProtKB/Swiss-Prot database

#### S2.1.1 Prediction of membrane associated proteins

Considered protein groups: Cytosolic and nuclear (1) vs Membrane (2)

**Supplementary Table S2.1.1a**  
Variables in the Equation

|                     |          | B       | S.E. | Wald      |
|---------------------|----------|---------|------|-----------|
| Step 1 <sup>a</sup> | DEK      | -29.934 | .172 | 30273.101 |
|                     | Constant | 4.862   | .033 | 21966.900 |
| Step 2 <sup>b</sup> | DEK      | -28.542 | .177 | 25904.514 |
|                     | FLMWY    | 16.261  | .204 | 6360.008  |
|                     | Constant | .985    | .056 | 304.305   |
| Step 3 <sup>c</sup> | DEK      | -25.293 | .187 | 18370.053 |
|                     | FLMWY    | 15.208  | .206 | 5453.942  |
|                     | KR       | -7.243  | .149 | 2358.325  |
|                     | Constant | 1.758   | .059 | 883.972   |
| Step 4 <sup>d</sup> | DEK      | -26.279 | .196 | 17972.201 |
|                     | FLMWY    | 10.580  | .220 | 2305.803  |
|                     | KR       | -13.732 | .185 | 5514.808  |
|                     | KRFYW    | 12.848  | .189 | 4637.805  |
|                     | Constant | .941    | .062 | 232.820   |

**Supplementary Table S2.1.1b**  
Classification Table<sup>c</sup>

| Observed |                    | Predicted                   |       |                    |                               |       |                    |
|----------|--------------------|-----------------------------|-------|--------------------|-------------------------------|-------|--------------------|
|          |                    | Selected cases <sup>a</sup> |       |                    | Unselected cases <sup>b</sup> |       |                    |
|          |                    | membr                       |       | Percentage Correct | membr                         |       | Percentage Correct |
|          |                    | 1                           | 2     |                    | 1                             | 2     |                    |
| Step 1   | membr 1            | 80716                       | 22864 | 77.9               | 34531                         | 9768  | 77.9               |
|          | 2                  | 11335                       | 30848 | 73.1               | 4968                          | 13093 | 72.5               |
|          | Overall Percentage |                             |       | 76.5               |                               |       | 76.4               |
| Step 2   | membr 1            | 82468                       | 21112 | 79.6               | 35185                         | 9114  | 79.4               |
|          | 2                  | 10997                       | 31186 | 73.9               | 4814                          | 13247 | 73.3               |
|          | Overall Percentage |                             |       | 78.0               |                               |       | 77.7               |
| Step 3   | membr 1            | 82967                       | 20613 | 80.1               | 35382                         | 8917  | 79.9               |
|          | 2                  | 10915                       | 31268 | 74.1               | 4798                          | 13263 | 73.4               |
|          | Overall Percentage |                             |       | 78.4               |                               |       | 78.0               |
| Step 4   | membr 1            | 84635                       | 18945 | 81.7               | 36022                         | 8277  | 81.3               |
|          | 2                  | 10198                       | 31985 | 75.8               | 4417                          | 13644 | 75.5               |
|          | Overall Percentage |                             |       | 80.0               |                               |       | 79.6               |

a. Selected cases random LT 1

b. Unselected cases random GE 1

c. The cut value is .290

## S2.1.2 Classification of membrane associated proteins

Considered protein groups: monotopic (1) vs bi- and polytopic transmembrane (2)

**Supplementary Table S2.1.2a**  
**Variables in the Equation**

|                     |          | B       | S.E.  | Wald   |
|---------------------|----------|---------|-------|--------|
| Step 1 <sup>a</sup> | DEK      | -13.657 | 2.927 | 21.766 |
|                     | Constant | 3.167   | .580  | 29.796 |
| Step 2 <sup>b</sup> | DEK      | -30.160 | 4.642 | 42.212 |
|                     | DK       | 26.111  | 4.202 | 38.612 |
|                     | Constant | 2.456   | .709  | 12.001 |
| Step 3 <sup>c</sup> | DEK      | -28.270 | 4.730 | 35.719 |
|                     | DK       | 28.037  | 4.447 | 39.756 |
|                     | KRFYW    | -12.628 | 3.226 | 15.320 |
|                     | Constant | 5.008   | .990  | 25.595 |
| Step 4 <sup>d</sup> | DEK      | -27.502 | 4.905 | 31.440 |
|                     | DK       | 27.319  | 4.592 | 35.388 |
|                     | FYW      | 12.625  | 4.392 | 8.262  |
|                     | KRFYW    | -13.899 | 3.403 | 16.681 |
|                     | Constant | 3.136   | 1.164 | 7.258  |

a. Variable(s) entered on step 1: DEK.

b. Variable(s) entered on step 2: DK.

c. Variable(s) entered on step 3: KRFYW.

d. Variable(s) entered on step 4: FYW.

**Supplementary Table S2.1.2b**  
**Classification Table<sup>c</sup>**

| Observed           | Predicted                   |     |                    |                               |    |                    |
|--------------------|-----------------------------|-----|--------------------|-------------------------------|----|--------------------|
|                    | Selected cases <sup>a</sup> |     |                    | Unselected cases <sup>b</sup> |    |                    |
|                    | Group                       |     | Percentage Correct | Group                         |    | Percentage Correct |
|                    | 1                           | 2   |                    | 1                             | 2  |                    |
| Step 1 Group 1     | 70                          | 27  | 72.2               | 36                            | 18 | 66.7               |
| 2                  | 54                          | 130 | 70.7               | 18                            | 55 | 75.3               |
| Overall Percentage |                             |     | 71.2               |                               |    | 71.7               |
| Step 2 Group 1     | 85                          | 12  | 87.6               | 42                            | 12 | 77.8               |
| 2                  | 54                          | 130 | 70.7               | 18                            | 55 | 75.3               |
| Overall Percentage |                             |     | 76.5               |                               |    | 76.4               |
| Step 3 Group 1     | 86                          | 11  | 88.7               | 45                            | 9  | 83.3               |
| 2                  | 50                          | 134 | 72.8               | 14                            | 59 | 80.8               |
| Overall Percentage |                             |     | 78.3               |                               |    | 81.9               |
| Step 4 Group 1     | 84                          | 13  | 86.6               | 45                            | 9  | 83.3               |
| 2                  | 47                          | 137 | 74.5               | 12                            | 61 | 83.6               |
| Overall Percentage |                             |     | 78.6               |                               |    | 83.5               |

a. Selected cases Random LT 1

b. Unselected cases Random GE 1

c. The cut value is .630

### S2.1.3 Classification of polytopic transmembrane proteins

Considered protein groups: single-pass (3) vs multi-pass (4)

**Supplementary Table S2.1.3a**  
Variables in the Equation

|                     |          | B       | S.E. | Wald     |
|---------------------|----------|---------|------|----------|
| Step 1 <sup>a</sup> | FLMWY    | 34.510  | .401 | 7417.804 |
|                     | Constant | -7.024  | .091 | 5915.779 |
| Step 2 <sup>b</sup> | DEK      | -18.686 | .302 | 3817.378 |
|                     | FLMWY    | 31.269  | .419 | 5572.443 |
|                     | Constant | -3.070  | .107 | 827.093  |
| Step 3 <sup>c</sup> | DEK      | -15.336 | .319 | 2304.073 |
|                     | FLMWY    | 30.302  | .426 | 5068.612 |
|                     | KR       | -9.176  | .273 | 1126.961 |
|                     | Constant | -2.076  | .112 | 346.214  |
| Step 4 <sup>d</sup> | AFILMV   | 16.360  | .481 | 1157.086 |
|                     | DEK      | -14.512 | .326 | 1976.339 |
|                     | FLMWY    | 24.589  | .449 | 2996.424 |
|                     | KR       | -9.609  | .280 | 1176.860 |
|                     | Constant | -4.895  | .142 | 1179.912 |

**Supplementary Table S2.1.3b**  
Classification Table<sup>d</sup>

| Observed |                    | Predicted                   |       |                    |                                  |       |                    |
|----------|--------------------|-----------------------------|-------|--------------------|----------------------------------|-------|--------------------|
|          |                    | Selected cases <sup>a</sup> |       |                    | Unselected cases <sup>b..c</sup> |       |                    |
|          |                    | passes                      |       | Percentage Correct | passes                           |       | Percentage Correct |
|          |                    | 3                           | 4     |                    | 3                                | 4     |                    |
| Step 1   | passes 3           | 8312                        | 3779  | 68.7               | 3605                             | 1629  | 68.9               |
|          | 4                  | 7045                        | 23047 | 76.6               | 2997                             | 9830  | 76.6               |
|          | Overall Percentage |                             |       | 74.3               |                                  |       | 74.4               |
| Step 2   | passes 3           | 9276                        | 2815  | 76.7               | 4089                             | 1145  | 78.1               |
|          | 4                  | 6576                        | 23516 | 78.1               | 2796                             | 10031 | 78.2               |
|          | Overall Percentage |                             |       | 77.7               |                                  |       | 78.2               |
| Step 3   | passes 3           | 9540                        | 2551  | 78.9               | 4187                             | 1047  | 80.0               |
|          | 4                  | 6426                        | 23666 | 78.6               | 2727                             | 10100 | 78.7               |
|          | Overall Percentage |                             |       | 78.7               |                                  |       | 79.1               |
| Step 4   | passes 3           | 9663                        | 2428  | 79.9               | 4249                             | 985   | 81.2               |
|          | 4                  | 6137                        | 23955 | 79.6               | 2591                             | 10236 | 79.8               |
|          | Overall Percentage |                             |       | 79.7               |                                  |       | 80.2               |

a. Selected cases random LT 1

b. Unselected cases random GE 1

c. Some of the Selected cases are not classified due to either missing values in the independent variables or categorical variables with values out of the range of the Selected cases.

d. The cut value is .700

## S2.1.4 Classification of non-membrane proteins

Considered protein groups: cytoplasm (1) vs nucleus (2)

**Supplementary Table S2.1.4a**  
Variables in the Equation

|                     |          | B       | S.E. | Wald      |
|---------------------|----------|---------|------|-----------|
| Step 1 <sup>a</sup> | AFYWLIV  | -31.580 | .300 | 11104.256 |
|                     | Constant | 7.716   | .084 | 8430.788  |
| Step 2 <sup>b</sup> | AFYWLIV  | -31.484 | .307 | 10504.747 |
|                     | DE       | -13.516 | .211 | 4087.226  |
|                     | Constant | 10.035  | .096 | 11022.017 |
| Step 3 <sup>c</sup> | AFYWLIV  | -32.709 | .314 | 10822.148 |
|                     | DE       | -12.734 | .216 | 3486.247  |
|                     | K        | -6.077  | .152 | 1600.056  |
|                     | Constant | 11.217  | .103 | 11970.818 |
| Step 4 <sup>d</sup> | AFYWLIV  | -33.606 | .321 | 10967.106 |
|                     | DE       | -13.324 | .220 | 3678.919  |
|                     | K        | -5.727  | .156 | 1354.010  |
|                     | KRFYW    | 6.206   | .171 | 1318.969  |
|                     | Constant | 9.996   | .107 | 8704.538  |

a. Variable(s) entered on step 1: AFYWLIV.

b. Variable(s) entered on step 2: DE.

c. Variable(s) entered on step 3: K.

d. Variable(s) entered on step 4: KRFYW.

**Supplementary Table S2.1.4b**  
**Classification Table<sup>d</sup>**

| Observed |                    | Predicted                   |       |                    |                                 |      |                    |
|----------|--------------------|-----------------------------|-------|--------------------|---------------------------------|------|--------------------|
|          |                    | Selected cases <sup>a</sup> |       |                    | Unselected cases <sup>b,c</sup> |      |                    |
|          |                    | nucleus                     |       | Percentage Correct | nucleus                         |      | Percentage Correct |
|          |                    | 1                           | 2     |                    | 1                               | 2    |                    |
| Step 1   | nucleus 1          | 57644                       | 22159 | 72.2               | 24572                           | 9504 | 72.1               |
|          | 2                  | 8631                        | 15146 | 63.7               | 3747                            | 6476 | 63.3               |
|          | Overall Percentage |                             |       | 70.3               |                                 |      | 70.1               |
| Step 2   | nucleus 1          | 58207                       | 21596 | 72.9               | 24921                           | 9155 | 73.1               |
|          | 2                  | 7785                        | 15992 | 67.3               | 3345                            | 6878 | 67.3               |
|          | Overall Percentage |                             |       | 71.6               |                                 |      | 71.8               |
| Step 3   | nucleus 1          | 58702                       | 21101 | 73.6               | 25072                           | 9004 | 73.6               |
|          | 2                  | 7467                        | 16310 | 68.6               | 3176                            | 7047 | 68.9               |
|          | Overall Percentage |                             |       | 72.4               |                                 |      | 72.5               |
| Step 4   | nucleus 1          | 58642                       | 21161 | 73.5               | 25043                           | 9033 | 73.5               |
|          | 2                  | 7013                        | 16764 | 70.5               | 3017                            | 7206 | 70.5               |
|          | Overall Percentage |                             |       | 72.8               |                                 |      | 72.8               |

a. Selected cases random LT 1

b. Unselected cases random GE 1

c. Some of the Selected cases are not classified due to either missing values in the independent variables or categorical variables with values out of the range of the Selected cases.

d. The cut value is .230

## S2.2 High homology data from pathogenic *Firmicutes* and *Proteobacteria* (obtained from <http://www.mgc.ac.cn/VFs/main.htm>)

### S2.2.1 Prediction of membrane proteins

Considered protein groups: DNA-binding (1) vs membrane-associated (3) proteins from *Proteobacteria*

**Supplementary Table S2.2.1a**  
Variables in the Equation

|                     |          | B       | S.E.  | Wald   |
|---------------------|----------|---------|-------|--------|
| Step 1 <sup>a</sup> | FL       | -33.098 | 4.062 | 66.406 |
|                     | Constant | 7.092   | .819  | 74.979 |
| Step 2 <sup>b</sup> | FL       | -44.385 | 5.171 | 73.688 |
|                     | KR       | -22.106 | 3.625 | 37.194 |
|                     | Constant | 13.037  | 1.460 | 79.766 |
| Step 3 <sup>c</sup> | FL       | -42.300 | 6.077 | 48.453 |
|                     | KR       | -34.163 | 4.832 | 49.993 |
|                     | KRFYW    | 28.459  | 4.178 | 46.406 |
|                     | Constant | 7.702   | 1.725 | 19.931 |
| Step 4 <sup>d</sup> | FL       | -56.028 | 8.585 | 42.592 |
|                     | KR       | -36.161 | 5.634 | 41.197 |
|                     | KRFYW    | 36.480  | 5.297 | 47.425 |
|                     | R        | -21.917 | 4.171 | 27.608 |
|                     | Constant | 11.232  | 2.352 | 22.802 |

a. Variable(s) entered on step 1: FL.

b. Variable(s) entered on step 2: KR.

c. Variable(s) entered on step 3: KRFYW.

d. Variable(s) entered on step 4: R.

e. Variable(s) entered on step 5: M.

**Supplementary Table S2.2.1b**  
Classification Table<sup>d</sup>

| Observed           | Predicted                   |     |                    |                                 |    |                    |
|--------------------|-----------------------------|-----|--------------------|---------------------------------|----|--------------------|
|                    | Selected cases <sup>a</sup> |     |                    | Unselected cases <sup>b,c</sup> |    |                    |
|                    | Group13                     |     | Percentage Correct | Group13                         |    | Percentage Correct |
|                    | 1                           | 3   |                    | 1                               | 3  |                    |
| Step 1 Group13 1   | 90                          | 23  | 79.6               | 45                              | 14 | 76.3               |
| 3                  | 48                          | 164 | 77.4               | 23                              | 74 | 76.3               |
| Overall Percentage |                             |     | 78.2               |                                 |    | 76.3               |
| Step 2 Group13 1   | 91                          | 22  | 80.5               | 45                              | 14 | 76.3               |
| 3                  | 41                          | 171 | 80.7               | 24                              | 73 | 75.3               |
| Overall Percentage |                             |     | 80.6               |                                 |    | 75.6               |
| Step 3 Group13 1   | 101                         | 12  | 89.4               | 52                              | 7  | 88.1               |
| 3                  | 27                          | 185 | 87.3               | 14                              | 83 | 85.6               |
| Overall Percentage |                             |     | 88.0               |                                 |    | 86.5               |
| Step 4 Group13 1   | 108                         | 5   | 95.6               | 54                              | 5  | 91.5               |
| 3                  | 21                          | 191 | 90.1               | 8                               | 89 | 91.8               |
| Overall Percentage |                             |     | 92.0               |                                 |    | 91.7               |

a. Selected cases Random LT 1

b. Unselected cases Random GE 1

c. Some of the Selected cases are not classified due to either missing values in the independent variables or categorical variables with values out of the range of the Selected cases.

d. The cut value is .640

## S2.2.2 Prediction of membrane proteins (obtained from <http://www.mgc.ac.cn/VFs/main.htm>)

Considered protein groups: DNA-binding (2) vs membrane-associated (4) proteins from pathogenic *Firmicutes*

Supplementary Table S2.2.2a  
Variables in the Equation

|                     |          | B       | S.E.   | Wald   |
|---------------------|----------|---------|--------|--------|
| Step 1 <sup>a</sup> | DEK      | -27.558 | 5.983  | 21.218 |
|                     | Constant | 7.868   | 1.496  | 27.680 |
| Step 2 <sup>b</sup> | AFYWLIV  | -45.739 | 11.385 | 16.141 |
|                     | DEK      | -28.498 | 6.103  | 21.803 |
|                     | Constant | 21.770  | 3.980  | 29.913 |
| Step 3 <sup>c</sup> | AFYWLIV  | -49.787 | 12.841 | 15.033 |
|                     | DEK      | -44.350 | 8.890  | 24.886 |
|                     | DK       | 37.612  | 10.061 | 13.976 |
|                     | Constant | 20.365  | 4.277  | 22.671 |
| Step 4 <sup>d</sup> | AFYWLIV  | -47.108 | 13.888 | 11.505 |
|                     | DEK      | -52.605 | 10.392 | 25.627 |
|                     | DK       | 38.231  | 10.063 | 14.435 |
|                     | M        | -14.038 | 5.237  | 7.184  |
|                     | Constant | 22.247  | 4.652  | 22.873 |

a. Variable(s) entered on step 1: DEK.

b. Variable(s) entered on step 2: AFYWLIV.

c. Variable(s) entered on step 3: DK.

d. Variable(s) entered on step 4: M.



**Supplementary Table S2.2.2b**  
**Classification Table<sup>d</sup>**

| Observed           | Predicted                   |     |                    |                                  |    |                    |
|--------------------|-----------------------------|-----|--------------------|----------------------------------|----|--------------------|
|                    | Selected cases <sup>a</sup> |     |                    | Unselected cases <sup>b..c</sup> |    |                    |
|                    | Group24                     |     | Percentage Correct | Group24                          |    | Percentage Correct |
|                    | 2                           | 4   |                    | 2                                | 4  |                    |
| Step 1 Group24 2   | 23                          | 10  | 69.7               | 13                               | 2  | 86.7               |
| 4                  | 51                          | 87  | 63.0               | 21                               | 41 | 66.1               |
| Overall Percentage |                             |     | 64.3               |                                  |    | 70.1               |
| Step 2 Group24 2   | 25                          | 8   | 75.8               | 9                                | 6  | 60.0               |
| 4                  | 28                          | 110 | 79.7               | 11                               | 51 | 82.3               |
| Overall Percentage |                             |     | 78.9               |                                  |    | 77.9               |
| Step 3 Group24 2   | 27                          | 6   | 81.8               | 10                               | 5  | 66.7               |
| 4                  | 28                          | 110 | 79.7               | 13                               | 49 | 79.0               |
| Overall Percentage |                             |     | 80.1               |                                  |    | 76.6               |
| Step 4 Group24 2   | 28                          | 5   | 84.8               | 11                               | 4  | 73.3               |
| 4                  | 21                          | 117 | 84.8               | 14                               | 48 | 77.4               |
| Overall Percentage |                             |     | 84.8               |                                  |    | 76.6               |

a. Selected cases Random LT 1

b. Unselected cases Random GE 1

c. Some of the Selected cases are not classified due to either missing values in the independent variables or categorical variables with values out of the range of the Selected cases.

d. The cut value is .810

## Supplementary S2.2.3 Prediction of membrane proteins by host organism

**Considered protein groups: membrane-associated proteins from pathogenic *Proteobacteria* (3) and *Firmicutes* (4)**

**Supplementary Table S2.2.3a**  
Variables in the Equation

|                     |          | B       | S.E.  | Wald   |
|---------------------|----------|---------|-------|--------|
| Step 1 <sup>a</sup> | AFILMV   | 21.921  | 4.495 | 23.786 |
|                     | Constant | -5.823  | 1.098 | 28.146 |
| Step 2 <sup>b</sup> | AFILMV   | 25.525  | 4.704 | 29.445 |
|                     | FLWYAEQ  | -21.305 | 5.461 | 15.218 |
|                     | Constant | -.643   | 1.670 | .148   |
| Step 3 <sup>c</sup> | AFILMV   | 32.545  | 5.168 | 39.657 |
|                     | DEK      | 12.485  | 2.839 | 19.339 |
|                     | FLWYAEQ  | -19.235 | 5.755 | 11.170 |
|                     | Constant | -5.287  | 2.058 | 6.600  |

a. Variable(s) entered on step 1: AFILMV.

b. Variable(s) entered on step 2: DEK.

c. Variable(s) entered on step 3: FLWYAEQ.

**Supplementary Table S2.2.3b**

**Classification Table<sup>d</sup>**

| Observed |                    |   | Predicted                   |     |                    |                                 |    |                    |
|----------|--------------------|---|-----------------------------|-----|--------------------|---------------------------------|----|--------------------|
|          |                    |   | Selected cases <sup>a</sup> |     |                    | Unselected cases <sup>b,c</sup> |    |                    |
|          |                    |   | Group34                     |     | Percentage Correct | Group34                         |    | Percentage Correct |
|          |                    |   | 3                           | 4   |                    | 3                               | 4  |                    |
| Step 1   | Group34            | 3 | 176                         | 53  | 76.9               | 62                              | 18 | 77.5               |
|          |                    | 4 | 68                          | 67  | 49.6               | 34                              | 31 | 47.7               |
|          | Overall Percentage |   |                             |     | 66.8               |                                 |    | 64.1               |
| Step 2   | Group34            | 3 | 183                         | 34  | 84.3               | 74                              | 18 | 80.4               |
|          |                    | 4 | 27                          | 113 | 80.7               | 16                              | 44 | 73.3               |
|          | Overall Percentage |   |                             |     | 82.9               |                                 |    | 77.6               |
| Step 3   | Group34            | 3 | 194                         | 23  | 89.4               | 79                              | 13 | 85.9               |
|          |                    | 4 | 20                          | 120 | 85.7               | 14                              | 46 | 76.7               |
|          | Overall Percentage |   |                             |     | 88.0               |                                 |    | 82.2               |

a. Selected cases Random LT 1

b. Unselected cases Random GE 1

c. Some of the Selected cases are not classified due to either missing values in the independent variables or categorical variables with values out of the range of the Selected cases.

d. The cut value is .41

## S3 Classification by functional properties

### S3.1 Classification of non-membrane proteins obtained from UniProtKB/Swiss-Prot database

#### S3.1.1 General functional classification

Considered protein groups: cytoskeletons (1) vs enzymes (2) vs transcription factors (3)

Supplementary Table S3.1.1a  
Variables Entered/Removed<sup>a,b,c,d</sup>

|    | Entered | Statistic | Between Groups |
|----|---------|-----------|----------------|
| 1  | KR      | .040      | 2 and 3        |
| 2  | FLMWY   | .202      | 2 and 3        |
| 3  | AFYWLIV | .271      | 1 and 3        |
| 4  | FYW     | .321      | 1 and 3        |
| 5  | DEK     | .364      | 1 and 3        |
| 6  | FL      | .378      | 1 and 3        |
| 7  | K       | .396      | 1 and 3        |
| 8  | FLWYAEQ | .411      | 1 and 3        |
| 9  | DE      | .421      | 1 and 3        |
| 10 | D       | .427      | 1 and 3        |
| 11 | AFILMV  | .431      | 1 and 3        |
| 12 | R       | .435      | 1 and 3        |
| 13 | E       | .439      | 1 and 3        |
| 14 | M       | .441      | 1 and 3        |
| 15 | DK      | .443      | 1 and 3        |
| 16 | KRFYW   | .444      | 1 and 3        |

At each step, the variable that maximizes the Mahalanobis distance between the two closest groups is entered.

- Maximum number of steps is 32.
- Maximum significance of F to enter is .05.
- Minimum significance of F to remove is .10.
- F level, tolerance, or VIF insufficient for further computation.

**Supplementary Table S3.1.1b**  
**Standardized Canonical**  
**Discriminant Function**  
**Coefficients**

|         | Function |       |
|---------|----------|-------|
|         | 1        | 2     |
| AFILMV  | .126     | -.143 |
| AFYWLIV | .770     | .090  |
| D       | .069     | -.143 |
| DE      | .214     | .224  |
| DEK     | -.211    | .230  |
| DK      | .068     | .084  |
| E       | .036     | -.103 |
| FL      | -.074    | -.221 |
| FLMWY   | .098     | .545  |
| FLWYAEQ | -.157    | .201  |
| FYW     | .119     | -.363 |
| K       | .153     | .226  |
| KR      | -.330    | .387  |
| KRFYW   | .170     | .037  |
| M       | .130     | .071  |
| R       | .054     | .105  |

**Supplementary Table S3.1.1c**  
**Classification Results<sup>a,b</sup>**

|                |                  |          |         | Predicted Group Membership |       |      | Total |
|----------------|------------------|----------|---------|----------------------------|-------|------|-------|
|                |                  |          |         | 1                          | 2     | 3    |       |
| Selected cases | Original         | Count    | Group 1 | 2236                       | 991   | 956  | 4183  |
|                |                  |          | Group 2 | 8185                       | 20174 | 6371 | 34730 |
|                |                  |          | Group 3 | 4489                       | 3983  | 6148 | 14620 |
|                | %                |          | Group 1 | 53.5                       | 23.7  | 22.9 | 100.0 |
|                |                  |          | Group 2 | 23.6                       | 58.1  | 18.3 | 100.0 |
|                |                  |          | Group 3 | 30.7                       | 27.2  | 42.1 | 100.0 |
|                | Unselected cases | Original | Count   | Group 1                    | 858   | 436  | 446   |
| Group 2        |                  |          |         | 3526                       | 8683  | 2697 | 14906 |
| Group 3        |                  |          |         | 1868                       | 1611  | 2649 | 6128  |
| %              |                  |          | Group 1 | 49.3                       | 25.1  | 25.6 | 100.0 |
|                |                  |          | Group 2 | 23.7                       | 58.3  | 18.1 | 100.0 |
|                |                  |          | Group 3 | 30.5                       | 26.3  | 43.2 | 100.0 |

a. 53.3% of Selected original grouped cases correctly classified.

b. 53.5% of Unselected original grouped cases correctly classified.

### S3.1.2 Prediction of cytoskeleton proteins among non-membrane proteins (Selected cases)

Considered protein groups: cytoskeletons (1) vs others (2)

**Supplementary Table S3.1.2a**  
Variables in the Equation

|                     |          | B      | S.E. | Wald    |
|---------------------|----------|--------|------|---------|
| Step 1 <sup>a</sup> | KR       | -9.584 | .446 | 461.694 |
|                     | Constant | 1.804  | .086 | 436.067 |
| Step 2 <sup>b</sup> | AFYWLIV  | 11.562 | .863 | 179.290 |
|                     | KR       | -8.976 | .453 | 391.824 |
|                     | Constant | -1.596 | .266 | 36.112  |
| Step 3 <sup>c</sup> | AFYWLIV  | 11.790 | .867 | 184.834 |
|                     | FYW      | 5.428  | .458 | 140.488 |
|                     | KR       | -7.962 | .462 | 297.511 |
|                     | Constant | -2.696 | .283 | 90.693  |
| Step 4 <sup>d</sup> | AFYWLIV  | 12.229 | .874 | 195.953 |
|                     | DEK      | -5.834 | .627 | 86.475  |
|                     | FYW      | 5.680  | .461 | 151.889 |
|                     | KR       | -6.210 | .497 | 155.867 |
|                     | Constant | -1.940 | .295 | 43.352  |
| Step 5 <sup>e</sup> | AFYWLIV  | 15.469 | .967 | 256.001 |
|                     | DEK      | -5.794 | .630 | 84.552  |
|                     | FLMWY    | -6.064 | .723 | 70.345  |
|                     | FYW      | 6.313  | .474 | 177.785 |
|                     | KR       | -6.247 | .500 | 156.021 |
|                     | Constant | -1.655 | .298 | 30.757  |
| Step 6 <sup>f</sup> | AFYWLIV  | 16.310 | .982 | 276.074 |
|                     | DEK      | -6.834 | .654 | 109.096 |
|                     | E        | 3.279  | .489 | 45.033  |
|                     | FLMWY    | -6.037 | .725 | 69.247  |
|                     | FYW      | 5.675  | .483 | 138.065 |
|                     | KR       | -5.897 | .504 | 136.734 |
|                     | Constant | -2.179 | .310 | 49.390  |

a. Variable(s) entered on step 1: KR.

b. Variable(s) entered on step 2: AFYWLIV.

c. Variable(s) entered on step 3: FYW.

d. Variable(s) entered on step 4: DEK.

e. Variable(s) entered on step 5: FLMWY.

f. Variable(s) entered on step 6: E.

**Supplementary Table S3.1.2b**  
**Classification Table<sup>c</sup>**

| Observed |                    | Predicted                   |      |                    |                               |      |                    |
|----------|--------------------|-----------------------------|------|--------------------|-------------------------------|------|--------------------|
|          |                    | Selected cases <sup>a</sup> |      |                    | Unselected cases <sup>b</sup> |      |                    |
|          |                    | Group12                     |      | Percentage Correct | Group12                       |      | Percentage Correct |
|          |                    | 1                           | 2    |                    | 1                             | 2    |                    |
| Step 1   | Group12 1          | 2466                        | 1696 | 59.3               | 1040                          | 721  | 59.1               |
|          | 2                  | 1695                        | 2520 | 59.8               | 700                           | 1118 | 61.5               |
|          | Overall Percentage |                             |      | 59.5               |                               |      | 60.3               |
| Step 2   | Group12 1          | 2467                        | 1695 | 59.3               | 1051                          | 710  | 59.7               |
|          | 2                  | 1521                        | 2694 | 63.9               | 655                           | 1163 | 64.0               |
|          | Overall Percentage |                             |      | 61.6               |                               |      | 61.9               |
| Step 3   | Group12 1          | 2520                        | 1642 | 60.5               | 1069                          | 692  | 60.7               |
|          | 2                  | 1513                        | 2702 | 64.1               | 656                           | 1162 | 63.9               |
|          | Overall Percentage |                             |      | 62.3               |                               |      | 62.3               |
| Step 4   | Group12 1          | 2537                        | 1625 | 61.0               | 1080                          | 681  | 61.3               |
|          | 2                  | 1478                        | 2737 | 64.9               | 663                           | 1155 | 63.5               |
|          | Overall Percentage |                             |      | 63.0               |                               |      | 62.4               |
| Step 5   | Group12 1          | 2599                        | 1563 | 62.4               | 1094                          | 667  | 62.1               |
|          | 2                  | 1506                        | 2709 | 64.3               | 664                           | 1154 | 63.5               |
|          | Overall Percentage |                             |      | 63.4               |                               |      | 62.8               |
| Step 6   | Group12 1          | 2660                        | 1502 | 63.9               | 1113                          | 648  | 63.2               |
|          | 2                  | 1532                        | 2683 | 63.7               | 641                           | 1177 | 64.7               |
|          | Overall Percentage |                             |      | 63.8               |                               |      | 64.0               |

a. Selected cases Random LT 1

b. Unselected cases Random GE 1

c. The cut value is .500

### S3.1.3 Prediction of cytosolic non-cytoskeletal proteins by function

Considered protein groups: enzymes (2) vs transcription factors (3)

**Supplementary Table S3.1.3a**  
Variables in the Equation

|                     |          | B       | S.E. | Wald     |
|---------------------|----------|---------|------|----------|
| Step 1 <sup>a</sup> | AFYWLIV  | -23.496 | .375 | 3930.340 |
|                     | Constant | 5.810   | .106 | 2983.677 |
| Step 2 <sup>b</sup> | AFYWLIV  | -23.960 | .378 | 4019.160 |
|                     | K        | -3.168  | .175 | 327.401  |
|                     | Constant | 6.442   | .113 | 3245.032 |
| Step 3 <sup>c</sup> | AFYWLIV  | -23.785 | .380 | 3913.074 |
|                     | K        | -3.245  | .177 | 335.107  |
|                     | KR       | 3.070   | .201 | 232.143  |
|                     | Constant | 5.866   | .119 | 2425.944 |
| Step 4 <sup>d</sup> | AFYWLIV  | -23.612 | .381 | 3843.073 |
|                     | DE       | -3.839  | .255 | 225.865  |
|                     | K        | -2.829  | .179 | 250.810  |
|                     | KR       | 3.288   | .203 | 261.590  |
|                     | Constant | 6.362   | .124 | 2618.463 |
| Step 5 <sup>e</sup> | AFYWLIV  | -22.614 | .387 | 3420.574 |
|                     | DE       | -3.953  | .256 | 238.362  |
|                     | K        | -3.278  | .182 | 323.511  |
|                     | KR       | 5.278   | .252 | 438.172  |
|                     | KRFYW    | -3.562  | .261 | 185.941  |
|                     | Constant | 6.681   | .127 | 2768.713 |

a. Variable(s) entered on step 1: AFYWLIV.

b. Variable(s) entered on step 2: K.

c. Variable(s) entered on step 3: KR.

d. Variable(s) entered on step 4: DE.

e. Variable(s) entered on step 5: KRFYW.

Supplementary Table S3.1.3b

Classification Table<sup>d</sup>

| Observed |                    | Predicted                   |       |                    |                                  |      |                    |
|----------|--------------------|-----------------------------|-------|--------------------|----------------------------------|------|--------------------|
|          |                    | Selected cases <sup>a</sup> |       |                    | Unselected cases <sup>b..c</sup> |      |                    |
|          |                    | Group23                     |       | Percentage Correct | Group23                          |      | Percentage Correct |
|          |                    | 2                           | 3     |                    | 2                                | 3    |                    |
| Step 1   | Group23 2          | 23555                       | 11182 | 67.8               | 10131                            | 4768 | 68.0               |
|          | 3                  | 5798                        | 8652  | 59.9               | 2548                             | 3750 | 59.5               |
|          | Overall Percentage |                             |       | 65.5               |                                  |      | 65.5               |
| Step 2   | Group23 2          | 23559                       | 11178 | 67.8               | 10137                            | 4762 | 68.0               |
|          | 3                  | 5749                        | 8701  | 60.2               | 2498                             | 3800 | 60.3               |
|          | Overall Percentage |                             |       | 65.6               |                                  |      | 65.7               |
| Step 3   | Group23 2          | 23409                       | 11328 | 67.4               | 10041                            | 4858 | 67.4               |
|          | 3                  | 5574                        | 8876  | 61.4               | 2409                             | 3889 | 61.7               |
|          | Overall Percentage |                             |       | 65.6               |                                  |      | 65.7               |
| Step 4   | Group23 2          | 23488                       | 11249 | 67.6               | 10105                            | 4794 | 67.8               |
|          | 3                  | 5630                        | 8820  | 61.0               | 2448                             | 3850 | 61.1               |
|          | Overall Percentage |                             |       | 65.7               |                                  |      | 65.8               |
| Step 5   | Group23 2          | 23598                       | 11139 | 67.9               | 10100                            | 4799 | 67.8               |
|          | 3                  | 5623                        | 8827  | 61.1               | 2438                             | 3860 | 61.3               |
|          | Overall Percentage |                             |       | 65.9               |                                  |      | 65.9               |

a. Selected cases Random LT 1

b. Unselected cases Random GE 1

c. Some of the Selected cases are not classified due to either missing values in the independent variables or categorical variables with values out of the range of the Selected cases.

d. The cut value is .290



### S3.2 Classification of membrane proteins obtained from RCSB PDB database

Considered protein groups: ATP-binding (1) vs Transporters (2) vs G-protein receptors (3) vs Photosynthetic (4) vs Rhodopsines (5)

**Supplementary Table S3.2a**  
Variables Entered/Removed<sup>a,b,c,d</sup>

|    | Entered | Removed | Statistic | Between Groups |
|----|---------|---------|-----------|----------------|
| 1  | KR      |         | .041      | 2 and 4        |
| 2  | FLWYAEQ |         | .511      | 1 and 3        |
| 3  | DEK     |         | .943      | 3 and 4        |
| 4  | FLMWY   |         | 1.296     | 3 and 4        |
| 5  | K       |         | 1.657     | 2 and 3        |
| 6  | KRFYW   |         | 2.102     | 1 and 3        |
| 7  | R       |         | 2.473     | 2 and 3        |
| 8  | DE      |         | 2.700     | 2 and 3        |
| 9  | D       |         | 2.921     | 2 and 3        |
| 10 | AFYWLIV |         | 3.045     | 2 and 3        |
| 11 | DK      |         | 3.168     | 2 and 3        |
| 12 |         | D       | 2.800     | 2 and 3        |
| 13 | FL      |         | 2.854     | 2 and 3        |
| 14 |         | FLMWY   | 2.750     | 2 and 3        |
| 15 | E       |         | 2.751     | 2 and 3        |
| 16 | FYW     |         | 2.753     | 2 and 3        |
| 17 | AFILMV  |         | 2.754     | 2 and 3        |

At each step, the variable that maximizes the Mahalanobis distance between the two closest groups is entered.

- a. Maximum number of steps is 32.
- b. Maximum significance of F to enter is .05.
- c. Minimum significance of F to remove is .10.
- d. F level, tolerance, or VIN insufficient for further computation.

**Supplementary Table S3.2b**  
**Standardized Canonical Discriminant Function Coefficients**

|         | Function |       |       |       |
|---------|----------|-------|-------|-------|
|         | 1        | 2     | 3     | 4     |
| AFILMV  | .386     | -.146 | .325  | .184  |
| AFYWLIV | -.347    | .180  | -.345 | -.342 |
| DE      | -.290    | -.342 | -.361 | -.376 |
| DEK     | .174     | -.479 | .622  | .188  |
| DK      | -.458    | .455  | .048  | -.347 |
| E       | .444     | .128  | .040  | .084  |
| FL      | -.571    | -.501 | -.178 | .488  |
| FLWYAEQ | .707     | .252  | .287  | -.370 |
| FYW     | .358     | .113  | -.193 | .104  |
| K       | .615     | .148  | .590  | -.318 |
| KR      | -.259    | .095  | .423  | -.210 |
| KRFYW   | -.242    | .435  | .187  | .571  |
| R       | .119     | -.146 | -.426 | .404  |

**Supplementary Table S3.2c**  
**Classification Results<sup>a,b</sup>**

|                  |                |         | Predicted Group Membership |      |      |      |      | Total |
|------------------|----------------|---------|----------------------------|------|------|------|------|-------|
|                  |                |         | 1                          | 2    | 3    | 4    | 5    |       |
| Selected cases   | Original Count | Group 1 | 31                         | 5    | 3    | 2    | 2    | 43    |
|                  |                | Group 2 | 4                          | 39   | 15   | 3    | 2    | 63    |
|                  |                | Group 3 | 5                          | 5    | 21   | 0    | 0    | 31    |
|                  |                | Group 4 | 4                          | 1    | 0    | 28   | 0    | 33    |
|                  |                | Group 5 | 0                          | 1    | 1    | 2    | 28   | 32    |
|                  | %              | Group 1 | 72.1                       | 11.6 | 7.0  | 4.7  | 4.7  | 100.0 |
|                  |                | Group 2 | 6.3                        | 61.9 | 23.8 | 4.8  | 3.2  | 100.0 |
|                  |                | Group 3 | 16.1                       | 16.1 | 67.7 | .0   | .0   | 100.0 |
|                  |                | Group 4 | 12.1                       | 3.0  | .0   | 84.8 | .0   | 100.0 |
|                  |                | Group 5 | .0                         | 3.1  | 3.1  | 6.3  | 87.5 | 100.0 |
| Unselected cases | Original Count | Group 1 | 14                         | 0    | 0    | 1    | 0    | 15    |
|                  |                | Group 2 | 1                          | 11   | 5    | 3    | 2    | 22    |
|                  |                | Group 3 | 0                          | 1    | 7    | 1    | 0    | 9     |
|                  |                | Group 4 | 2                          | 0    | 0    | 10   | 0    | 12    |
|                  |                | Group 5 | 0                          | 0    | 0    | 1    | 7    | 8     |
|                  | %              | Group 1 | 93.3                       | .0   | .0   | 6.7  | .0   | 100.0 |
|                  |                | Group 2 | 4.5                        | 50.0 | 22.7 | 13.6 | 9.1  | 100.0 |
|                  |                | Group 3 | .0                         | 11.1 | 77.8 | 11.1 | .0   | 100.0 |
|                  |                | Group 4 | 16.7                       | .0   | .0   | 83.3 | .0   | 100.0 |
|                  |                | Group 5 | .0                         | .0   | .0   | 12.5 | 87.5 | 100.0 |

a. 72.8% of Selected original grouped cases correctly classified.

b. 74.2% of Unselected original grouped cases correctly classified.

### S3.3 Classification of membrane proteins (Selected example)

Considered protein groups: ATP-binding (1) vs Transporters (2)

**Supplementary Table S3.3a**  
Variables in the Equation

|                     |          | B       | S.E.   | Wald   |
|---------------------|----------|---------|--------|--------|
| Step 1 <sup>a</sup> | KRFYW    | -26.290 | 6.316  | 17.326 |
|                     | Constant | 6.338   | 1.519  | 17.417 |
| Step 2 <sup>b</sup> | DK       | -14.877 | 4.392  | 11.475 |
|                     | KRFYW    | -34.823 | 7.541  | 21.324 |
|                     | Constant | 10.879  | 2.271  | 22.940 |
| Step 3 <sup>c</sup> | AFYWLIV  | 23.761  | 10.451 | 5.169  |
|                     | DK       | -17.032 | 4.909  | 12.036 |
|                     | KRFYW    | -34.930 | 7.715  | 20.500 |
|                     | Constant | 4.202   | 3.517  | 1.428  |

a. Variable(s) entered on step 1: KRFYW.

b. Variable(s) entered on step 2: DK.

c. Variable(s) entered on step 3: AFYWLIV.

**Supplementary Table S3.3b**

**Classification Table<sup>c</sup>**

| Observed           | Predicted                   |    |                    |                               |    |                    |
|--------------------|-----------------------------|----|--------------------|-------------------------------|----|--------------------|
|                    | Selected cases <sup>a</sup> |    |                    | Unselected cases <sup>b</sup> |    |                    |
|                    | Group                       |    | Percentage Correct | Group                         |    | Percentage Correct |
|                    | 1                           | 2  |                    | 1                             | 2  |                    |
| Step 1 Group 1     | 31                          | 10 | 75.6               | 15                            | 2  | 88.2               |
| 2                  | 22                          | 30 | 57.7               | 16                            | 17 | 51.5               |
| Overall Percentage |                             |    | 65.6               |                               |    | 64.0               |
| Step 2 Group 1     | 31                          | 10 | 75.6               | 14                            | 3  | 82.4               |
| 2                  | 13                          | 39 | 75.0               | 10                            | 23 | 69.7               |
| Overall Percentage |                             |    | 75.3               |                               |    | 74.0               |
| Step 3 Group 1     | 33                          | 8  | 80.5               | 15                            | 2  | 88.2               |
| 2                  | 13                          | 39 | 75.0               | 8                             | 25 | 75.8               |
| Overall Percentage |                             |    | 77.4               |                               |    | 80.0               |

a. Selected cases Approximately 70% of the cases (SAMPLE) EQ 1

b. Unselected cases Approximately 70% of the cases (SAMPLE) NE 1

c. The cut value is .600

### S3.4 Classification of membrane proteins (Selected example for transmembrane proteins of *Firmicutes* except *Helicobacteria*, no photosynthetic, no ATP-binding)

Considered protein groups: Transporters (2) vs Sensors (3)

Supplementary Table S3.4a

Variables in the Equation

|                     |          | B      | S.E.  | Wald   |
|---------------------|----------|--------|-------|--------|
| Step 1 <sup>a</sup> | KRFYW    | 33.441 | 7.667 | 19.023 |
|                     | Constant | -8.850 | 1.954 | 20.521 |

a. Variable(s) entered on step 1: KRFYW.

Supplementary Table S3.4b  
Classification Table<sup>c</sup>

| Observed           | Predicted                   |    |                    |                               |   |                    |
|--------------------|-----------------------------|----|--------------------|-------------------------------|---|--------------------|
|                    | Selected cases <sup>a</sup> |    |                    | Unselected cases <sup>b</sup> |   |                    |
|                    | Group                       |    | Percentage Correct | Group                         |   | Percentage Correct |
|                    | 2                           | 3  |                    | 2                             | 3 |                    |
| Step 1 Group 2     | 47                          | 15 | 75.8               | 18                            | 5 | 78.3               |
| 3                  | 8                           | 22 | 73.3               | 2                             | 8 | 80.0               |
| Overall Percentage |                             |    | 75.0               |                               |   | 78.8               |

a. Selected cases Approximately 70% of the cases (SAMPLE) EQ 1

b. Unselected cases Approximately 70% of the cases (SAMPLE) NE 1

c. The cut value is .330
